# Supplementary material for: Association between Feelings of Trust and Security with Subjective Health among Mexican Migrants in the New York City Area
Source: MDPI journal article supplement (doi:10.3390/ijerph20042981), 2023-02-08
Supplement: s1 [file s1]

## Supplementary Material

**Table S1. Logistic regression on Self-reported Health Status (5 model variations).**

|                                               | (1)<br>Separate items  | (2)<br>Security item   | (3)<br>Trust score        | (4)<br>Trust score and<br>neighborhood<br>safety | (5)<br>Trust score *<br>Neighborhood<br>safety | (6)<br>Trust and safety<br>score |
|-----------------------------------------------|------------------------|------------------------|---------------------------|--------------------------------------------------|------------------------------------------------|----------------------------------|
| Age (years)                                   | 1.024 [0.994, 1.056]   | 1.011 [0.983, 1.041]   | 1.012 [0.984, 1.042]      | 1.019 [0.989, 1.050]                             | 1.018 [0.989, 1.050]                           | 1.016 [0.987, 1.047]             |
| Sex                                           | 1.334 [0.794, 2.249]   | 1.392 [0.850, 2.287]   | 1.292 [0.782, 2.140]      | 1.305 [0.784, 2.179]                             | 1.296 [0.778, 2.165]                           | 1.318 [0.794, 2.195]             |
| Household<br>composition                      | 0.755 [0.445, 1.276]   | 0.727 [0.440, 1.195]   | 0.797 [0.478, 1.324]      | 0.741 [0.438, 1.245]                             | 0.731 [0.432, 1.231]                           | 0.762 [0.454, 1.275]             |
| Employment<br>status                          | 1.407 [0.746, 2.675]   | 1.514 [0.845, 2.739]   | 1.427 [0.779, 2.638]      | 1.334 [0.716, 2.507]                             | 1.330 [0.711, 2.503]                           | 1.431 [0.777, 2.659]             |
| Length of<br>residence in<br>the US (years)   | 0.976 [0.938, 1.014]   | 0.989 [0.954, 1.026]   | 0.991 [0.955, 1.028]      | 0.985 [0.949, 1.024]                             | 0.985 [0.948, 1.023]                           | 0.985 [0.949, 1.023]             |
| Diagnosed<br>comorbidities                    | 2.782** [1.655, 4.754] | 2.522** [1.544, 4.172] | 2.767** [1.671,<br>4.656] | 2.687** [1.609,<br>4.559]                        | 2.705** [1.618, 4.593]                         | 2.704** [1.626,<br>4.565]        |
| Has valid<br>health<br>insurance in<br>the US | 1.117 [0.675, 1.847]   | 1.142 [0.712, 1.833]   | 0.962 [0.591, 1.562]      | 1.033 [0.629, 1.692]                             | 1.030 [0.627, 1.688]                           | 0.996 [0.609, 1.625]             |

|                                                        |                       |                        |                       |                       |                        |                       |
|--------------------------------------------------------|-----------------------|------------------------|-----------------------|-----------------------|------------------------|-----------------------|
| How frequently has gotten medical care when needed     | 1.644 [0.986, 2.770]  | 1.384 [0.853, 2.259]   | 1.711+ [1.044, 2.835] | 1.605 [0.969, 2.685]  | 1.646 [0.989, 2.768]   | 1.701+ [1.034, 2.829] |
| <b>Subjective measures of trust and safety</b>         |                       |                        |                       |                       |                        |                       |
| I can trust most people in my community                | 0.533+ [0.301, 0.929] | .                      | .                     | .                     | .                      | .                     |
| I can get help from my neighbors whenever I need it    | 2.108* [1.154, 3.924] | .                      | .                     | .                     | .                      | .                     |
| I feel safe when I walk alone at night in my community | 1.144 [0.511, 2.569]  | .                      | .                     | .                     | .                      | .                     |
| Rating of neighborhood safety                          | 3.520* [1.393, 9.734] | 3.586** [1.719, 8.091] | .                     | 3.383* [1.450, 8.621] | 5.157* [1.396, 22.649] | .                     |

|                                                             |          |          |                      |                      |                      |                       |
|-------------------------------------------------------------|----------|----------|----------------------|----------------------|----------------------|-----------------------|
| Three-item measure of trust                                 | .        | .        | 1.177 [0.924, 1.505] | 1.028 [0.783, 1.348] | 1.350 [0.656, 2.763] | .                     |
| Three-item measure of trust * Rating of neighborhood safety | .        | .        | .                    | .                    | 0.729 [0.338, 1.575] | .                     |
| Four-item composite measure of trust and safety             | .        | .        | .                    | .                    | .                    | 1.257+ [1.021, 1.557] |
| <i>Num.Obs.</i>                                             | 225      | 240      | 227                  | 225                  | 225                  | 225                   |
| <i>AIC</i>                                                  | 306.7    | 325.9    | 316.1                | 308.6                | 310.1                | 310.6                 |
| <i>BIC</i>                                                  | 351.1    | 360.7    | 350.3                | 346.1                | 351.1                | 344.7                 |
| <i>Log.Lik.</i>                                             | -140.331 | -152.939 | -148.03              | -143.284             | -143.048             | -145.286              |
| <i>RMSE</i>                                                 | 0.47     | 0.47     | 0.48                 | 0.47                 | 0.47                 | 0.48                  |

OR calculated at 90% confidence level. Exponentiated coefficients; 95% confidence intervals in brackets. +  $p < 0.1$ , \*  $p < 0.05$ , \*\*  $p < 0.01$

**Table S2. Regression process on Self-reported Health Status by each of the four items on trust and safety.**

| <b>Dependent: Self-Reported Health Status</b>             | <b>Univariable<br/>Regressions (each<br/>Coefficient alone)</b> | <b>Multivariable Regression</b> | <b>Multivariable<br/>Regression with<br/>Coefficients which had<br/>a p-Value &lt; 0.2</b> |
|-----------------------------------------------------------|-----------------------------------------------------------------|---------------------------------|--------------------------------------------------------------------------------------------|
| Age (years)                                               | 1.00 (0.97-1.03, p=.961)                                        | 1.02 (0.99-1.06, p=.195)        |                                                                                            |
| Sex                                                       | 1.25 (0.74-2.12, p=.403)                                        | 1.33 (0.72-2.48, p=.362)        |                                                                                            |
| Household composition                                     | 0.74 (0.42-1.29, p=.283)                                        | 0.76 (0.40-1.41, p=.380)        |                                                                                            |
| Employment status                                         | 1.29 (0.69-2.41, p=.429)                                        | 1.41 (0.66-3.00, p=.378)        |                                                                                            |
| Length of residence in the US (years)                     | 0.99 (0.96-1.02, p=.610)                                        | 0.98 (0.93-1.02, p=.296)        |                                                                                            |
| Diagnosed comorbidities                                   | 2.42 (1.41-4.16, p=.001)                                        | 2.78 (1.49-5.21, p=.001)        | 2.81 (1.55-5.08, p<.001)                                                                   |
| Has valid health insurance in the US                      | 1.17 (0.68-1.99, p=.572)                                        | 1.12 (0.61-2.03, p=.717)        |                                                                                            |
| How frequently has gotten medical care<br>when needed     | 1.32 (0.78-2.25, p=.296)                                        | 1.64 (0.89-3.04, p=.112)        | 1.70 (0.94-3.06, p=.078)                                                                   |
| I can trust most people in my community                   | 0.99 (0.58-1.70, p=.985)                                        | 0.53 (0.27-1.04, p=.066)        | 0.59 (0.32-1.12, p=.106)                                                                   |
| I can get help from my neighbors whenever<br>I need it    | 1.83 (0.99-3.38, p=.055)                                        | 2.11 (1.02-4.36, p=.044)        | 2.03 (1.01-4.10, p=.047)                                                                   |
| I feel safe when I walk alone at night in my<br>community | 1.93 (0.95-3.91, p=.069)                                        | 1.14 (0.44-2.98, p=.783)        |                                                                                            |
| Rating of neighborhood safety                             | 3.99 (1.56-10.23,<br>p=.004)                                    | 3.52 (1.12-11.11, p=.032)       | 3.68 (1.35-10.00, p=.011)                                                                  |

OR calculated at 95% confidence level.
